# Supplementary material for: Plant Growth Regulators and Activated Charcoal Selectively Affect Phenylethanoid and Flavone Glycoside Accumulation in Sideritis scardica Griseb. Tissue Culture
Source: MDPI journal article supplement (doi:10.3390/plants12132541), 2023-07-04
Supplement: s1 [file s1]

**Table S1.** HPLC-UV/Vis-ESI-MS/MS data and individual phenylethanoids content (mg/g,  $n=3$ ) in AC and PGR treated, as well as in situ collected samples of *Sideritis scardica*

|                          | $t_R$ | UV max                    | [M-H] <sup>-</sup> | MS <sup>2</sup>              | <i>In situ</i> | C_0   | C_1   | C_2   | C_3   | C_4   | Sm    | Sr_1  | Sr_2  | Sr_3  | Sr_4  |
|--------------------------|-------|---------------------------|--------------------|------------------------------|----------------|-------|-------|-------|-------|-------|-------|-------|-------|-------|-------|
| 5-Caffeoylquinic acid    | 9.7   | 242, 294sh, 326           | 353                | 191, 179                     | 3.42           | 5.96  | 4.54  | 7.82  | 3.60  | 7.45  | 3.84  | 3.30  | 3.28  | 1.75  | 1.89  |
| Echinacoside             | 12.6  | 232, 246sh, 290, 332      | 785                | 623, 461                     | 3.77           | 4.32  | 11.89 | 10.96 | 22.07 | 31.76 | 30.20 | 35.02 | 19.07 | 18.91 | 26.29 |
| Lavandulifolioside       | 12.9  | 232, 246, 290, 332        | 755                | 623, 593, 461                | 7.26           | 3.91  | 12.99 | 8.66  | 19.38 | 8.32  | 13.66 | 13.54 | 6.42  | 6.67  | 8.99  |
| Verbascoside             | 13.6  | 232, 244, 290, 302sh, 332 | 623                | 487, 477, 461, 443, 315, 297 | 8.65           | 15.07 | 16.53 | 22.36 | 19.82 | 19.90 | 20.14 | 15.67 | 4.50  | 10.59 | 11.68 |
| Forsythoside A           | 13.9  | 246, 286, 304, 334        | 623                | 578, 463, 461, 445, 316, 301 | 1.72           | nd    | nd    | nd    | nd    | nd    | nd    | 0.46  | 0.90  | 1.02  | 1.26  |
| Leucoseptoside glycoside | 15.7  | 234, 292sh, 328           | 799                | 637, 623, 461                | nd             | nd    | nd    | nd    | nd    | nd    | 1.41  | nd    | nd    | 0.32  | nd    |
| Echinacoside isomer      | 15.9  | 232, 246sh, 290, 332      | 785                | 623, 461, 315                | 3.36           | nd    | nd    | nd    | nd    | 4.15  | 11.74 | 3.25  | 3.11  | 2.17  | 4.48  |
| Forsythoside B           | 16.0  | 232, 246, 290, 332        | 755                | 623, 593, 461, 315           | 4.59           | nd    | nd    | nd    | nd    | 5.32  | 5.06  | 7.49  | 5.98  | 4.62  | 4.31  |
| Leucoseptoside A         | 16.8  | 234, 288, 330             | 637                | 491, 461, 443, 325           | 1.51           | 2.08  | 2.49  | 3.21  | 1.84  | 3.62  | nd    | 3.27  | 1.77  | 2.67  | 3.33  |
| Isoleucoseptoside        | 17.9  | 234, 288, 330             | 637                | 491, 461, 443, 325           | nd             | 1.63  | 0.74  | 0.79  | nd    | 0.62  | nd    | 0.57  | nd    | nd    | nd    |

nd – not detected

**Table S2.** HPLC-UV/Vis-ESI-MS/MS data and individual flavone glycosides content (mg/g,  $n=3$ ) in AC and PGR treated, as well as in situ collected samples of *Sideritis scardica*

|                                                                       | $t_R$ | UV<br>max       | [M-<br>H] <sup>-</sup> | MS <sup>2</sup>    | in situ | C_0  | C_1  | C_2  | C_3  | C_4  | Sm   | Sr_1 | Sr_2 | Sr_3 | Sr_4 |
|-----------------------------------------------------------------------|-------|-----------------|------------------------|--------------------|---------|------|------|------|------|------|------|------|------|------|------|
| <b>Luteolin derivatives</b>                                           |       |                 |                        |                    |         |      |      |      |      |      |      |      |      |      |      |
| Luteolin 7- <i>O</i> -allosyl(1→2)-[6''- <i>O</i> -acetyl]-glucoside  | 17.9  | 256, 350        | 651                    | 609, 447, 285      | 2.78    | nd   |
| Luteolin 7- <i>O</i> -allosyl(1→2)glucoside                           | 18.6  | 256, 352        | 609                    | 591, 447, 429, 285 | 4.79    | nd   | 2.54 | 1.79 | 4.36 | 0.66 | nd   | nd   | nd   | 0.41 | nd   |
| Luteolin 7- <i>O</i> -[6'''- <i>O</i> -acetyl]-allosyl(1→2)-glucoside | 20.3  | 256, 350        | 651                    | 591, 429, 285      | 0.93    | nd   |
| Methyl-luteolin 7- <i>O</i> -allosyl(1→2)glucoside                    | 33.7  | 256, 352        | 623                    | 461, 443, 299      | nd      | nd   | 0.49 | 0.76 | 0.57 | 0.64 | 0.56 | 0.49 | 0.23 | 0.46 | 0.43 |
| <b>Apigenin dervatives</b>                                            |       |                 |                        |                    |         |      |      |      |      |      |      |      |      |      |      |
| apigenin glucoside                                                    | 21.2  | 266, 290, 332   | 431                    | 269                | 1.03    | 0.25 | 0.20 | 0.23 | nd   | nd   | 0.33 | 0.25 | nd   | 0.35 | nd   |
| apigenin 7- <i>O</i> -[6'''- <i>O</i> -acetyl]-allosyl(1→2)glucoside  | 21.6  | 266, 290sh, 344 | 635                    | 593, 431, 413, 269 | 0.81    | 0.63 | 0.52 | 0.68 | nd   | nd   | 0.71 | 0.62 | nd   | 0.58 | nd   |
| apigenin 7-(4''- <i>p</i> -coumaroyl)glucoside)                       | 35.4  | 232, 268, 318   | 577                    | 431, 413, 307, 269 | nd      | 0.43 | 0.41 | 0.49 | nd   | 0.19 | 0.20 | 0.35 | nd   | nd   | nd   |

|                                                                                                 |      |                    |     |                              |       |       |       |       |       |       |       |       |      |      |      |
|-------------------------------------------------------------------------------------------------|------|--------------------|-----|------------------------------|-------|-------|-------|-------|-------|-------|-------|-------|------|------|------|
| apigenin-7- <i>O</i> -glucoside                                                                 | 39.2 | 266, 290, 332      | 577 | 269                          | nd    | nd    | 0.81  | 0.81  | nd    | nd    | nd    | nd    | nd   | nd   | nd   |
|                                                                                                 |      |                    |     |                              |       |       |       |       |       |       |       |       |      |      |      |
| <b>chryseriol derivatives</b>                                                                   |      |                    |     |                              |       |       |       |       |       |       |       |       |      |      |      |
| chryseriol 7- <i>O</i> -[6'''- <i>O</i> -acetyl]-allosyl(1→2)glucoside                          | 22.3 | 252, 270, 346      | 665 | 623, 503, 461, 443, 299, 284 | 1.41  | nd    | nd    | nd    | nd    | nd    | 0.45  | 0.30  | nd   | 0.36 | 0.43 |
|                                                                                                 |      |                    |     |                              |       |       |       |       |       |       |       |       |      |      |      |
| <b>Isoscutellarein derivatives</b>                                                              |      |                    |     |                              |       |       |       |       |       |       |       |       |      |      |      |
| Isoscutellarein 7- <i>O</i> -[6'''- <i>O</i> -acetyl]-allosyl(1→2)glucoside                     | 23.7 | 230, 276, 306, 330 | 651 | 609, 591, 447, 429, 285      | 63.22 | 21.33 | 16.45 | 24.51 | 14.18 | 20.01 | 13.09 | 12.19 | 0.64 | 7.98 | 7.02 |
| 4'- <i>O</i> -Methylisoscutellarein 7- <i>O</i> -allosyl(1→2)glucoside                          | 28.4 | 230, 292, 314      | 623 | 461, 443, 299                | 2.09  | nd    | nd    | nd    | 1.44  | nd    | 0.32  | 0.29  | nd   | 0.33 | 0.28 |
| Isoscutellarein 7- <i>O</i> -allosyl(1→2)-[6''- <i>O</i> -acetyl]-glucoside                     | 30.6 |                    | 651 | 471, 285                     | 1.41  | nd    | nd   | 0.30 | 0.23 |
| 4'- <i>O</i> -Methylisoscutellarein 7- <i>O</i> -allosyl(1→2)-[6''- <i>O</i> -acetyl]-glucoside | 33.9 | 230, 276, 306, 328 | 665 | 299                          | 1.50  | nd    | nd   | nd   | nd   |
| 4'- <i>O</i> -Methylisoscutellarein 7- <i>O</i> -[6'''- <i>O</i> -acetyl]-allosyl(1→2)glucoside | 36.7 | 230, 276, 306, 328 | 665 | 623, 503, 461, 443, 299, 284 | 9.98  | 8.18  | 6.32  | 9.06  | 6.40  | 7.98  | 6.35  | 5.16  | 0.22 | 5.37 | 4.27 |
| Isoscutellarein 7- <i>O</i> -[6'''- <i>O</i> -acetyl]-allosyl                                   | 39.1 | 230, 276,          | 693 | 651, 633, 609, 489,          | 24.18 | 4.56  | 0.81  | 1.78  | nd    | 4.73  | 0.85  | 1.09  | 0.31 | nd   | nd   |

|                                                                                                                     |      |                         |     |                                        |      |      |      |      |      |      |      |      |    |      |      |
|---------------------------------------------------------------------------------------------------------------------|------|-------------------------|-----|----------------------------------------|------|------|------|------|------|------|------|------|----|------|------|
| (1→2)-[6''- <i>O</i> -acetyl]-glycoside                                                                             |      | 308, 328                |     | 471, 429, 285                          |      |      |      |      |      |      |      |      |    |      |      |
| 4'- <i>O</i> -Methylisoscutellarein 7- <i>O</i> -[6'''- <i>O</i> -acetyl]-allosyl(1→2)glucoside                     | 40.5 | 230, 280, 306, 330      | 707 | 665, 647, 605, 545, 503, 299, 284      | 4.81 | nd   | nd   | nd   | nd   | 0.98 | nd   | 0.91 | nd | nd   | nd   |
| <b>Hypolaetin derivatives</b>                                                                                       |      |                         |     |                                        |      |      |      |      |      |      |      |      |    |      |      |
| 3'- <i>O</i> -Methylhypolaetin 7- <i>O</i> -allosyl(1→2)glucoside                                                   | 18.8 | 230, 256, 276, 300, 342 | 639 | 477, 315                               | nd   | 1.42 | nd   | nd   | nd   | nd   | nd   | nd   | nd | nd   | nd   |
| Hypolaetin 7- <i>O</i> -[6'''- <i>O</i> -acetyl]-allosyl(1→2)glucoside                                              | 19.6 | 230, 254, 276, 300, 344 | 667 | 625, 607, 505, 463, 445, 301           | 1.22 | nd   | nd   | nd   | nd   | nd   | 0.41 | 0.38 | nd | nd   | nd   |
| 3'- <i>O</i> -Methylhypolaetin 7- <i>O</i> -[6'''- <i>O</i> -acetyl]-allosyl(1→2)glucoside                          | 24.5 | 230, 256, 276, 300, 342 | 681 | 639, 621, 519, 501, 459, 441, 315, 301 | 3.11 | 3.16 | 1.89 | 3.18 | 2.12 | 3.06 | 1.67 | 2.57 | nd | 1.85 | 1.52 |
| 4'- <i>O</i> -Methylhypolaetin 7- <i>O</i> -[6'''- <i>O</i> -acetyl]-allosyl(1→2)-[6''- <i>O</i> -acetyl]-glucoside | 40.4 | 228, 256, 276, 302, 340 | 723 | 681, 663, 639, 621, 477, 315, 301      | nd   | 1.74 | 1.66 | 1.95 | nd   | 1.26 | 0.56 | 0.92 | nd | nd   | nd   |

nd – not detected

Table S3 (a) Eigen values from PCA analysis

| Axis | Eigen value | % explained | Histogram   | % cumulated |
|------|-------------|-------------|-------------|-------------|
| 1    | 3.500528    | 43.76%      | <div></div> | 43.76%      |
| 2    | 2.120761    | 26.51%      | <div></div> | 70.27%      |
| 3    | 0.837948    | 10.47%      | <div></div> | 80.74%      |
| 4    | 0.717971    | 8.97%       | <div></div> | 89.72%      |
| 5    | 0.489508    | 6.12%       | <div></div> | 95.83%      |
| 6    | 0.238772    | 2.98%       | <div></div> | 98.82%      |
| 7    | 0.092445    | 1.16%       | <div></div> | 99.97%      |
| 8    | 0.002067    | 0.03%       | -           | 100.00%     |
| Tot. | 8.000000    | -           | -           | -           |

Factor Loadings [Communality Estimates]

| Attribute                   | Axis_1  |             | Axis_2  |             | Axis_3  |             | Axis_4  |             | Axis_5  |             | Axis_6  |             | Axis_7  |             | Axis_8  |             |
|-----------------------------|---------|-------------|---------|-------------|---------|-------------|---------|-------------|---------|-------------|---------|-------------|---------|-------------|---------|-------------|
|                             | Corr.   | % (Tot. %)  |
| -                           |         |             |         |             |         |             |         |             |         |             |         |             |         |             |         |             |
| 5-Caffeoylquinic acid       | 0.1397  | 2 % (2 %)   | -0.9003 | 81 % (83 %) | 0.1201  | 1 % (84 %)  | -0.0519 | 0 % (85 %)  | 0.3163  | 10 % (95 %) | 0.1852  | 3 % (98 %)  | -0.1353 | 2 % (100 %) | -0.0097 | 0 % (100 %) |
| Phenylethanoides            | -0.5173 | 27 % (27 %) | 0.0747  | 1 % (27 %)  | 0.8113  | 66 % (93 %) | 0.2446  | 6 % (99 %)  | -0.0392 | 0 % (99 %)  | 0.0745  | 1 % (100 %) | 0.0416  | 0 % (100 %) | 0.0038  | 0 % (100 %) |
| Luteolin derivatives        | 0.7611  | 58 % (58 %) | 0.1841  | 3 % (61 %)  | 0.2169  | 5 % (66 %)  | -0.5458 | 30 % (96 %) | -0.0540 | 0 % (96 %)  | 0.1573  | 2 % (99 %)  | 0.1180  | 1 % (100 %) | -0.0134 | 0 % (100 %) |
| Apigenin derivatives        | 0.6609  | 44 % (44 %) | -0.4403 | 19 % (63 %) | -0.0705 | 0 % (64 %)  | 0.2618  | 7 % (70 %)  | -0.5152 | 27 % (97 %) | 0.1726  | 3 % (100 %) | -0.0240 | 0 % (100 %) | 0.0043  | 0 % (100 %) |
| Chrysoeriol derivatives     | 0.7465  | 56 % (56 %) | 0.5742  | 33 % (89 %) | 0.2091  | 4 % (93 %)  | 0.1267  | 2 % (95 %)  | -0.0539 | 0 % (95 %)  | -0.1477 | 2 % (97 %)  | -0.1675 | 3 % (100 %) | -0.0208 | 0 % (100 %) |
| Isoscutellarein derivatives | 0.9604  | 92 % (92 %) | 0.0185  | 0 % (92 %)  | 0.1820  | 3 % (96 %)  | -0.1249 | 2 % (97 %)  | 0.1382  | 2 % (99 %)  | -0.0779 | 1 % (100 %) | -0.0468 | 0 % (100 %) | 0.0348  | 0 % (100 %) |
| Hypolaetin derivatives      | 0.5380  | 29 % (29 %) | -0.7551 | 57 % (86 %) | 0.1063  | 1 % (87 %)  | 0.1613  | 3 % (90 %)  | 0.0409  | 0 % (90 %)  | -0.2886 | 8 % (98 %)  | 0.1343  | 2 % (100 %) | -0.0103 | 0 % (100 %) |
| Other derivatives           | 0.6544  | 43 % (43 %) | 0.4202  | 18 % (60 %) | -0.1585 | 3 % (63 %)  | 0.4810  | 23 % (86 %) | 0.3096  | 10 % (96 %) | 0.1822  | 3 % (99 %)  | 0.0981  | 1 % (100 %) | -0.0026 | 0 % (100 %) |
| Var. Expl.                  | 3.5005  | 44 % (44 %) | 2.1208  | 27 % (70 %) | 0.8379  | 10 % (81 %) | 0.7180  | 9 % (90 %)  | 0.4895  | 6 % (96 %)  | 0.2388  | 3 % (99 %)  | 0.0924  | 1 % (100 %) | 0.0021  | 0 % (100 %) |

Eigen vectors -- Factor Scores

| Attribute | Mean | Std-dev | Axis_1 | Axis_2 | Axis_3 | Axis_4 | Axis_5 | Axis_6 | Axis_7 | Axis_8 |
|-----------|------|---------|--------|--------|--------|--------|--------|--------|--------|--------|
|-----------|------|---------|--------|--------|--------|--------|--------|--------|--------|--------|

|                                    |           |           |           |           |           |           |           |           |           |           |
|------------------------------------|-----------|-----------|-----------|-----------|-----------|-----------|-----------|-----------|-----------|-----------|
| <b>5-Caffeoylquinic acid</b>       | 4.257811  | 1.928468  | 0.074648  | -0.618250 | 0.131205  | -0.061262 | 0.452097  | 0.379028  | -0.444945 | -0.212597 |
| <b>Phenylethanoides</b>            | 54.166640 | 17.990714 | -0.276463 | 0.051288  | 0.886299  | 0.288627  | -0.055986 | 0.152400  | 0.136968  | 0.083579  |
| <b>Luteolin derivatives</b>        | 2.080664  | 2.484197  | 0.406807  | 0.126451  | 0.236986  | -0.644192 | -0.077177 | 0.322002  | 0.388054  | -0.295204 |
| <b>Apigenin derivatives</b>        | 0.987191  | 0.792058  | 0.353237  | -0.302320 | -0.077010 | 0.308994  | -0.736436 | 0.353230  | -0.078849 | 0.095350  |
| <b>Chrysoeriol derivatives</b>     | 0.268562  | 0.406152  | 0.398993  | 0.394310  | 0.228432  | 0.149494  | -0.076969 | -0.302310 | -0.551033 | -0.458085 |
| <b>Isoscutellarein derivatives</b> | 29.371897 | 26.509148 | 0.513318  | 0.012688  | 0.198797  | -0.147354 | 0.197556  | -0.159498 | -0.153809 | 0.766149  |
| <b>Hypolaetin derivatives</b>      | 3.241232  | 1.729082  | 0.287555  | -0.518495 | 0.116150  | 0.190319  | 0.058528  | -0.590625 | 0.441548  | -0.227014 |
| <b>Other derivatives</b>           | 0.623293  | 0.523802  | 0.349784  | 0.288566  | -0.173130 | 0.567625  | 0.442495  | 0.372810  | 0.322803  | -0.056722 |

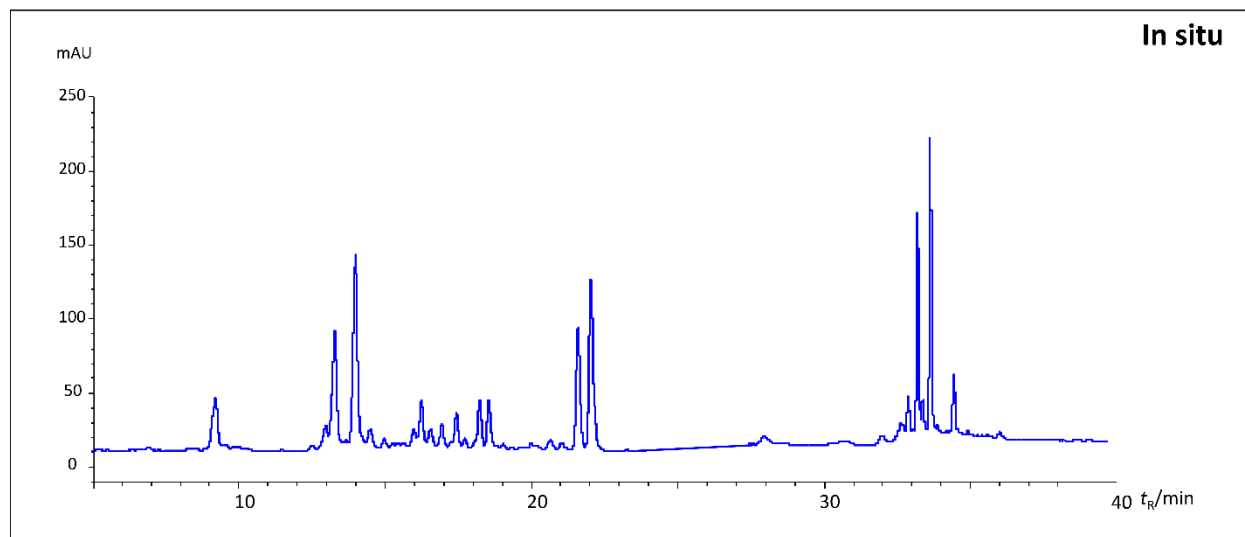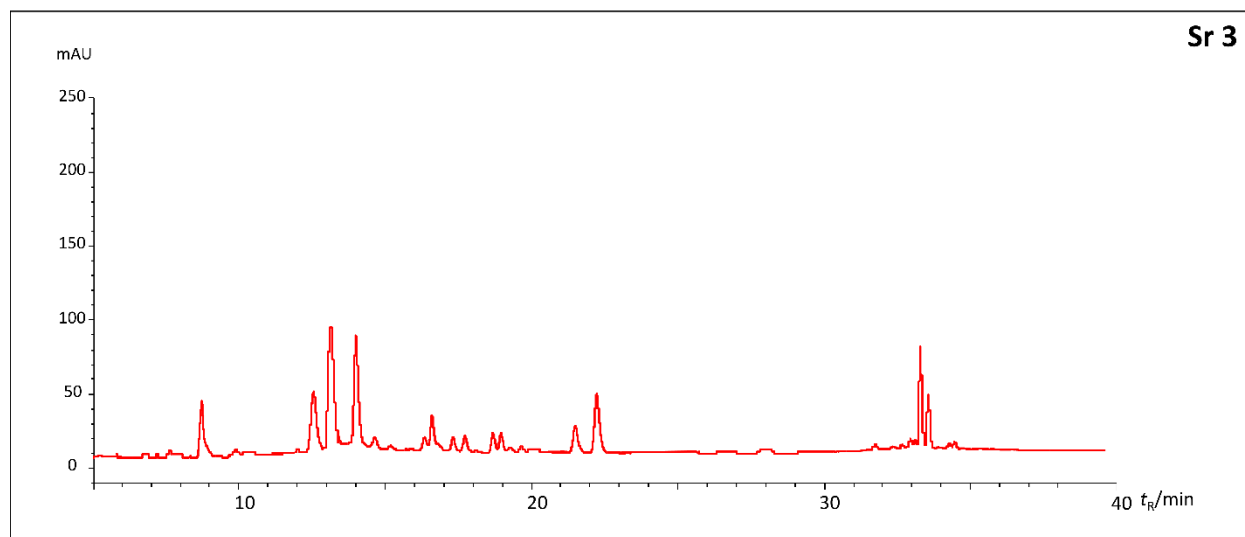

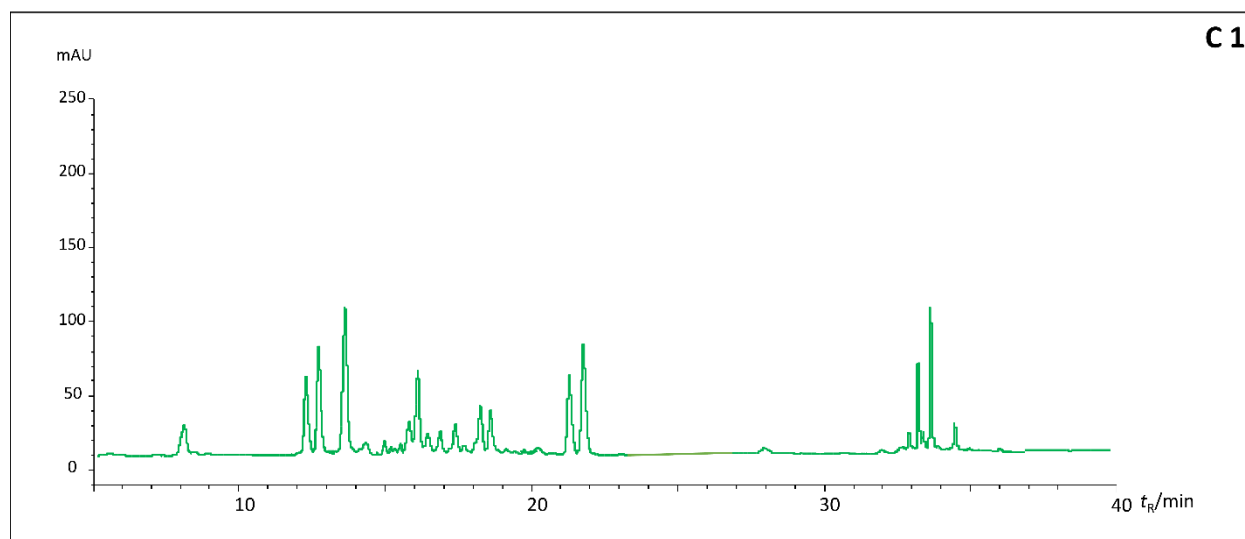

**Figure S1.** HPLC-DAD chromatograms at 330 nm for in situ sample, PGR supplementation (Sr\_3) and AC supplementation (C\_1)
